# Supplementary material for: Association between Cholesterol Level and the Risk of Hematologic Malignancy According to Menopausal Status: A Korean Nationwide Cohort Study
Source: MDPI journal article supplement (doi:10.3390/biomedicines10071617), 2022-07-06
Supplement: s1 [file s1]

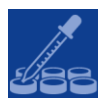

Supplementary Table S1. Baseline characteristics of study population.

|                          | Total<br>(n = 2,811,410) |                        |                     |         |
|--------------------------|--------------------------|------------------------|---------------------|---------|
|                          | Total                    | Hematologic malignancy |                     | p value |
|                          |                          | No<br>(n=2,805,961)    | Yes<br>(n=5,449)    |         |
| Age (years)              | 54.0±11.5                | 54.0±11.5              | 60.2±10.8           | <0.001  |
| BMI (kg/m <sup>2</sup> ) | 23.7±3.2                 | 23.7±3.2               | 24.3±3.3            | <0.001  |
| WC (cm)                  |                          |                        |                     | <0.001  |
| <75                      | 1,042,770(37.09)         | 1,041,282(37.11)       | 1,488(27.31)        |         |
| 75-85                    | 1,176,713(41.86)         | 1,174,327(41.85)       | 2,386(43.79)        |         |
| ≥85                      | 591,927(21.05)           | 590,352(21.04)         | 1,575(28.90)        |         |
| Total cholesterol*       | 200.8±42.8               | 200.8±42.8             | 199.6±38.6          | 0.039   |
| HDL-C*                   | 59.1±36.5                | 59.1±36.5              | 57.0±41.2           | <0.001  |
| LDL-C*                   | 121.4±73.5               | 121.4±73.5             | 122.1±72.6          | 0.517   |
| TG <sup>a</sup> *        | 102.51(102.45-102.58)    | 102.51(102.45,102.58)  | 113.3(111.71,114.9) | <0.001  |
| Smoking status           |                          |                        |                     | <0.001  |
| Never                    | 2,681,898(95.4)          | 2,676,642(95.4)        | 5256(96.5)          |         |
| Ex-smoker                | 41,527(1.5)              | 41,462(1.48)           | 65(1.2)             |         |
| Current smoker           | 87,985(3.1)              | 87,857(3.13)           | 128(2.4)            |         |
| Alcohol consumption      |                          |                        |                     | <0.001  |
| Non                      | 2,252,699(80.1)          | 2,247,980(80.1)        | 4,719(86.6)         |         |
| Mild (<30 mg/d)          | 535,918(19.1)            | 535,206(19.1)          | 712(13.1)           |         |
| Heavy (≥30 mg/d)         | 22,793(0.8)              | 22,775(0.8)            | 18(0.3)             |         |
| Regular exercise         | 487,169(17.3)            | 486,216(17.3)          | 953(17.5)           | 0.753   |
| Systolic BP**            | 121.8±16.1               | 121.8±16.1             | 124.8±16.1          | <0.001  |
| Diastolic BP**           | 75.2±10.3                | 75.2±10.3              | 76.3±10.2           | <0.001  |
| Fasting glucose*         | 97.0±22.1                | 97.0±22.1              | 99.5±24.4           | <0.001  |
| Hypertension, yes        | 908,286(32.3)            | 905,819(32.3)          | 2,467(45.3)         | <0.001  |
| Diabetes mellitus, yes   | 254,262(9.0)             | 253,510(9.0)           | 752(13.8)           | <0.001  |
| Dyslipidemia, yes        | 681,271(24.2)            | 679,747(24.2)          | 1,524(28.0)         | <0.001  |

Data are expressed as mean ± standard deviation or number (%), except for triglycerides, which are presented as media (interquartile range) using the Wilcoxon rank-sum test. WC, Waist circumference; BP, blood pressure; eGFR, estimated glomerular filtration rate; HDL-C, high-density lipoprotein cholesterol; LDL-C, low-density lipoprotein cholesterol; TG, triglycerides. \*Unit: mg/dL, \*\*Unit: mmHg. <sup>a</sup>Geometric mean (95% confidence interval).

Supplementary Table S2. Unadjusted and adjusted risks of hematologic malignancy by quartile of each lipid profile according to menopausal status.

|               |    |         | Premenopause<br>(n = 1,189,806)   |                         |                         | Postmenopause<br>(n = 1,621,604)  |                         |                         |
|---------------|----|---------|-----------------------------------|-------------------------|-------------------------|-----------------------------------|-------------------------|-------------------------|
| Lipid profile |    |         | Model 1<br>(Crude)<br>HR (95% CI) | Model 2<br>aHR (95% CI) | Model 3<br>aHR (95% CI) | Model 1<br>(Crude)<br>HR (95% CI) | Model 2<br>aHR (95% CI) | Model 3<br>aHR (95% CI) |
| TC            | Q1 | <175    | 1(Ref.)                           | 1(Ref.)                 | 1(Ref.)                 | 1(Ref.)                           | 1(Ref.)                 | 1(Ref.)                 |
|               | Q2 | 175-197 | 0.92(0.79,1.07)                   | 0.87(0.75,1.01)         | 0.85(0.73,0.99)         | 0.80(0.73,0.87)                   | 0.81(0.74,0.89)         | 0.81(0.74,0.88)         |
|               | Q3 | 198-223 | 1.07(0.92,1.25)                   | 0.96(0.83,1.12)         | 0.93(0.80,1.08)         | 0.74(0.68,0.80)                   | 0.76(0.70,0.83)         | 0.75(0.69,0.82)         |
|               | Q4 | ≥224    | 1.08(0.92,1.29)                   | 0.90(0.76,1.07)         | 0.86(0.73,1.03)         | 0.66(0.60,0.71)                   | 0.68(0.62,0.74)         | 0.67(0.61,0.73)         |
| HDL-C         | Q1 | <48     | 1(Ref.)                           | 1(Ref.)                 | 1(Ref.)                 | 1(Ref.)                           | 1(Ref.)                 | 1(Ref.)                 |
|               | Q2 | 48-55   | 0.88(0.74,1.03)                   | 0.90(0.76,1.06)         | 0.91(0.77,1.08)         | 0.80(0.74,0.87)                   | 0.84(0.78,0.91)         | 0.85(0.79,0.92)         |
|               | Q3 | 56-65   | 0.89(0.76,1.04)                   | 0.92(0.79,1.08)         | 0.95(0.81,1.11)         | 0.77(0.71,0.83)                   | 0.83(0.76,0.90)         | 0.84(0.78,0.91)         |
|               | Q4 | ≥66     | 0.73(0.62,0.86)                   | 0.76(0.64,0.90)         | 0.80(0.68,0.95)         | 0.62(0.56,0.67)                   | 0.68(0.62,0.75)         | 0.70(0.64,0.77)         |
| LDL-C         | Q1 | <96     | 1(Ref.)                           | 1(Ref.)                 | 1(Ref.)                 | 1(Ref.)                           | 1(Ref.)                 | 1(Ref.)                 |
|               | Q2 | 96-116  | 0.99(0.85,1.15)                   | 0.94(0.81,1.10)         | 0.92(0.79,1.07)         | 0.86(0.79,0.94)                   | 0.88(0.81,0.97)         | 0.88(0.80,0.96)         |
|               | Q3 | 117-140 | 1.10(0.94,1.28)                   | 1.00(0.85,1.16)         | 0.96(0.82,1.12)         | 0.84(0.77,0.91)                   | 0.87(0.80,0.94)         | 0.86(0.79,0.94)         |
|               | Q4 | ≥141    | 1.12(0.94,1.32)                   | 0.95(0.80,1.13)         | 0.90(0.75,1.07)         | 0.72(0.66,0.78)                   | 0.75(0.69,0.81)         | 0.74(0.68,0.80)         |
| TG            | Q1 | <72     | 1(Ref.)                           | 1(Ref.)                 | 1(Ref.)                 | 1(Ref.)                           | 1(Ref.)                 | 1(Ref.)                 |

|    |         |                 |                 |                 |                 |                 |                 |
|----|---------|-----------------|-----------------|-----------------|-----------------|-----------------|-----------------|
| Q2 | 72-100  | 1.18(1.02,1.37) | 1.11(0.96,1.29) | 1.09(0.94,1.27) | 1.09(0.98,1.21) | 1.01(0.91,1.12) | 1.00(0.90,1.11) |
| Q3 | 101-144 | 1.15(0.98,1.35) | 1.03(0.88,1.22) | 0.99(0.84,1.17) | 1.22(1.11,1.35) | 1.08(0.98,1.19) | 1.05(0.96,1.16) |
| Q4 | ≥145    | 1.51(1.29,1.78) | 1.30(1.10,1.53) | 1.22(1.02,1.44) | 1.19(1.09,1.31) | 1.02(0.93,1.12) | 0.98(0.89,1.08) |

Model 2 was adjusted for age. Model 3 was adjusted for age, body mass index, smoking, alcohol consumption, regular exercise, diabetes mellitus, and history of taking medication for dyslipidemia within a year. TC, total cholesterol; HDL-C, high-density lipoprotein cholesterol; LDL-C, low-density lipoprotein cholesterol; IR, incidence rate; PY, person years; aHR, adjusted hazard ratio; CI, confidence interval; TG, triglycerides.

**Supplementary Table S3.** Incidence rates of subtypes of hematologic malignancy by quartile of each lipid profile.

|       |    | Premenopause<br>(n = 1,189,806) |              |                                    | Postmenopause<br>(n = 1,621,604) |              |                                    | Premenopause<br>(n = 1,189,806) |              |                                    | Postmenopause<br>(n = 1,621,604) |              |                                    |
|-------|----|---------------------------------|--------------|------------------------------------|----------------------------------|--------------|------------------------------------|---------------------------------|--------------|------------------------------------|----------------------------------|--------------|------------------------------------|
|       |    | Subjects<br>(N)                 | Event<br>(n) | IR<br>(per 10 <sup>6</sup><br>PYs) | Subjects<br>(N)                  | Event<br>(n) | IR<br>(per 10 <sup>6</sup><br>PYs) | Subjects<br>(N)                 | Event<br>(n) | IR<br>(per 10 <sup>6</sup><br>PYs) | Subjects<br>(N)                  | Event<br>(n) | IR<br>(per 10 <sup>6</sup><br>PYs) |
|       |    | Multiple myeloma                |              |                                    |                                  |              |                                    | Non-hodgkin's lymphoma          |              |                                    |                                  |              |                                    |
| TC    | Q1 | 399,781                         | 82           | 24.7                               | 310,748                          | 368          | 144.8                              | 399,781                         | 143          | 43.0                               | 310,748                          | 355          | 139.7                              |
|       | Q2 | 332,944                         | 67           | 24.2                               | 360,025                          | 314          | 105.8                              | 332,944                         | 122          | 44.1                               | 360,025                          | 344          | 116.0                              |
|       | Q3 | 269,814                         | 52           | 23.2                               | 430,213                          | 348          | 98.0                               | 269,814                         | 103          | 45.9                               | 430,213                          | 411          | 115.7                              |
|       | Q4 | 187,267                         | 35           | 22.5                               | 520,618                          | 388          | 90.3                               | 187,267                         | 85           | 54.6                               | 520,618                          | 402          | 93.5                               |
| HDL-C | Q1 | 241,750                         | 64           | 31.8                               | 470,378                          | 538          | 139.4                              | 241,750                         | 103          | 51.1                               | 470,378                          | 507          | 131.4                              |
|       | Q2 | 277,350                         | 48           | 20.8                               | 402,498                          | 363          | 109.4                              | 277,350                         | 120          | 52.0                               | 402,498                          | 368          | 110.9                              |
|       | Q3 | 333,451                         | 70           | 25.3                               | 400,215                          | 315          | 95.4                               | 333,451                         | 124          | 44.8                               | 400,215                          | 367          | 111.1                              |
|       | Q4 | 337,255                         | 54           | 19.3                               | 348,513                          | 202          | 70.2                               | 337,255                         | 106          | 37.9                               | 348,513                          | 270          | 93.9                               |
| LDL-C | Q1 | 373,625                         | 77           | 24.8                               | 327,897                          | 344          | 128.3                              | 373,625                         | 133          | 42.8                               | 327,897                          | 361          | 134.6                              |
|       | Q2 | 337,040                         | 60           | 21.4                               | 352,114                          | 301          | 103.8                              | 337,040                         | 118          | 42.1                               | 352,114                          | 351          | 121.1                              |
|       | Q3 | 284,577                         | 65           | 27.5                               | 427,630                          | 381          | 107.9                              | 284,577                         | 112          | 47.3                               | 427,630                          | 396          | 112.2                              |
|       | Q4 | 194,564                         | 34           | 21.0                               | 513,963                          | 392          | 92.3                               | 194,564                         | 90           | 55.6                               | 513,963                          | 404          | 95.1                               |
| TG    | Q1 | 438,153                         | 75           | 20.6                               | 275,406                          | 210          | 92.1                               | 438,153                         | 143          | 39.3                               | 275,406                          | 224          | 98.2                               |
|       | Q2 | 322,417                         | 71           | 26.5                               | 364,952                          | 309          | 102.6                              | 322,417                         | 134          | 50.0                               | 364,952                          | 315          | 104.6                              |
|       | Q3 | 247,407                         | 43           | 20.9                               | 456,537                          | 414          | 110.2                              | 247,407                         | 94           | 45.7                               | 456,537                          | 474          | 126.2                              |
|       | Q4 | 181,829                         | 47           | 31.1                               | 524,709                          | 485          | 112.5                              | 181,829                         | 82           | 54.3                               | 524,709                          | 499          | 115.8                              |
|       |    | Hodgkin's lymphoma              |              |                                    |                                  |              |                                    | Lymphoid leukemia               |              |                                    |                                  |              |                                    |
| TC    | Q1 | 399,781                         | 10           | 3.0                                | 310,748                          | 43           | 16.9                               | 399,781                         | 45           | 13.5                               | 310,748                          | 74           | 29.1                               |
|       | Q2 | 332,944                         | 9            | 3.3                                | 360,025                          | 29           | 9.8                                | 332,944                         | 33           | 11.9                               | 360,025                          | 81           | 27.3                               |
|       | Q3 | 269,814                         | 16           | 7.1                                | 430,213                          | 40           | 11.3                               | 269,814                         | 22           | 9.8                                | 430,213                          | 79           | 22.2                               |
|       | Q4 | 187,267                         | 6            | 3.9                                | 520,618                          | 36           | 8.4                                | 187,267                         | 18           | 11.6                               | 520,618                          | 85           | 19.8                               |
| HDL-C | Q1 | 241,750                         | 7            | 3.5                                | 470,378                          | 52           | 13.5                               | 241,750                         | 27           | 13.4                               | 470,378                          | 111          | 28.8                               |
|       | Q2 | 277,350                         | 8            | 3.5                                | 402,498                          | 43           | 13.0                               | 277,350                         | 34           | 14.7                               | 402,498                          | 75           | 22.6                               |
|       | Q3 | 333,451                         | 13           | 4.7                                | 400,215                          | 38           | 11.5                               | 333,451                         | 29           | 10.5                               | 400,215                          | 77           | 23.3                               |
|       | Q4 | 337,255                         | 13           | 4.6                                | 348,513                          | 15           | 5.2                                | 337,255                         | 28           | 10.0                               | 348,513                          | 56           | 19.5                               |
| LDL-C | Q1 | 373,625                         | 11           | 3.5                                | 327,897                          | 42           | 15.7                               | 373,625                         | 33           | 10.6                               | 327,897                          | 79           | 29.5                               |
|       | Q2 | 337,040                         | 12           | 4.3                                | 352,114                          | 31           | 10.7                               | 337,040                         | 41           | 14.6                               | 352,114                          | 70           | 24.1                               |
|       | Q3 | 284,577                         | 13           | 5.5                                | 427,630                          | 34           | 9.6                                | 284,577                         | 26           | 11.0                               | 427,630                          | 85           | 24.1                               |
|       | Q4 | 194,564                         | 5            | 3.1                                | 513,963                          | 41           | 9.7                                | 194,564                         | 18           | 11.1                               | 513,963                          | 85           | 20.0                               |
| TG    | Q1 | 438,153                         | 15           | 4.1                                | 275,406                          | 21           | 9.2                                | 438,153                         | 40           | 11.0                               | 275,406                          | 41           | 18.0                               |
|       | Q2 | 322,417                         | 9            | 3.4                                | 364,952                          | 32           | 10.6                               | 322,417                         | 32           | 11.9                               | 364,952                          | 82           | 27.2                               |
|       | Q3 | 247,407                         | 9            | 4.4                                | 456,537                          | 40           | 10.6                               | 247,407                         | 24           | 11.7                               | 456,537                          | 99           | 26.3                               |
|       | Q4 | 181,829                         | 8            | 5.3                                | 524,709                          | 55           | 12.8                               | 181,829                         | 22           | 14.6                               | 524,709                          | 97           | 22.5                               |
|       |    | Myeloid leukemia                |              |                                    |                                  |              |                                    |                                 |              |                                    |                                  |              |                                    |
| TC    | Q1 | 399,781                         | 141          | 42.4                               | 310,748                          | 265          | 104.3                              |                                 |              |                                    |                                  |              |                                    |
|       | Q2 | 332,944                         | 98           | 35.4                               | 360,025                          | 253          | 85.3                               |                                 |              |                                    |                                  |              |                                    |
|       | Q3 | 269,814                         | 106          | 47.2                               | 430,213                          | 264          | 74.3                               |                                 |              |                                    |                                  |              |                                    |
|       | Q4 | 187,267                         | 70           | 45.0                               | 520,618                          | 304          | 70.7                               |                                 |              |                                    |                                  |              |                                    |
| HDL-C | Q1 | 241,750                         | 97           | 48.2                               | 470,378                          | 376          | 97.4                               |                                 |              |                                    |                                  |              |                                    |
|       | Q2 | 277,350                         | 97           | 42.0                               | 402,498                          | 257          | 77.4                               |                                 |              |                                    |                                  |              |                                    |
|       | Q3 | 333,451                         | 124          | 44.8                               | 400,215                          | 255          | 77.2                               |                                 |              |                                    |                                  |              |                                    |
|       | Q4 | 337,255                         | 97           | 34.7                               | 348,513                          | 198          | 68.8                               |                                 |              |                                    |                                  |              |                                    |

|       |    |         |     |      |         |     |      |
|-------|----|---------|-----|------|---------|-----|------|
| LDL-C | Q1 | 373,625 | 124 | 39.9 | 327,897 | 261 | 97.3 |
|       | Q2 | 337,040 | 112 | 40.0 | 352,114 | 247 | 85.2 |
|       | Q3 | 284,577 | 106 | 44.8 | 427,630 | 276 | 78.2 |
|       | Q4 | 194,564 | 73  | 45.1 | 513,963 | 302 | 71.1 |
| TG    | Q1 | 438,153 | 130 | 35.7 | 275,406 | 177 | 77.6 |
|       | Q2 | 322,417 | 113 | 42.2 | 364,952 | 237 | 78.7 |
|       | Q3 | 247,407 | 82  | 39.9 | 456,537 | 308 | 82.0 |
|       | Q4 | 181,829 | 90  | 59.5 | 524,709 | 364 | 84.4 |

TC, total cholesterol; HDL-C, high-density lipoprotein cholesterol; LDL-C, low-density lipoprotein cholesterol; TG, triglycerides; IR incidence rate, PY person years.
